# Supplementary material
Source: PubMed Central journal article supplement (PMC3646372)
Supplement: NIHMS404391-supplement-Supplementary_Table_1.pdf [file NIHMS404391-supplement-Supplementary_Table_1.pdf]

**Supplementary Table 1. Background responses by Primate Center.** For this analysis, failure is defined as having mock responses >0.15% for two or more of the six outcome variables.

| Primate Center | Number Animals | % of Failures CD4 | % of Failures CD8 | % Failure Total | Significant Fisher's Exact |
|----------------|----------------|-------------------|-------------------|-----------------|----------------------------|
| A              | 19             | 0                 | 15.79             | 15.79           |                            |
| B              | 4              | 0                 | 50                | 50              |                            |
| C              | 27             | 0                 | 11.11             | 11.11           |                            |
| D              | 43             | 13.95             | 16.28             | 30.23           | *                          |
| E              | 6              | 0                 | 16.67             | 16.67           |                            |
| F              | 3              | 0                 | 0                 | 0               |                            |
| G              | 8              | 0                 | 0                 | 0               |                            |
